# Supplementary material
Source: Springer Nature journal article supplement (https://www.springermedizin.de/resource/supplementary/12935_2011_301_MOESM1_ESM.pdf/9540264)

## Normal

## Tumour

x40

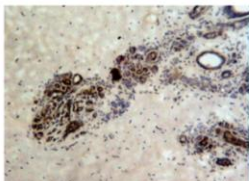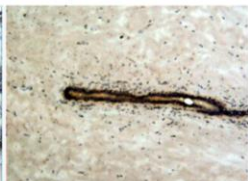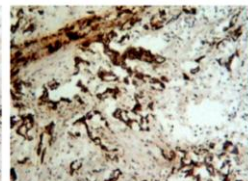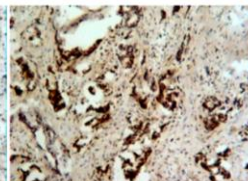

x100

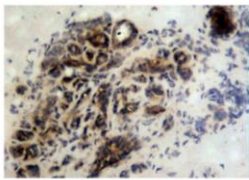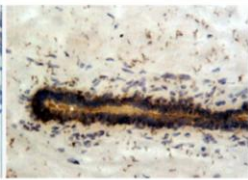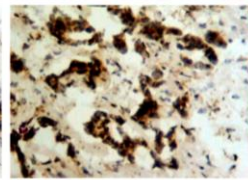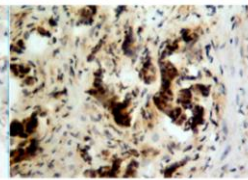

x200

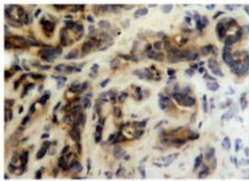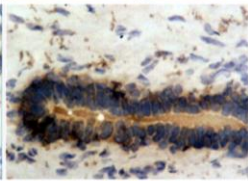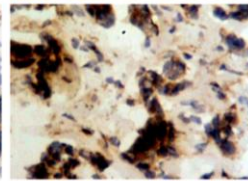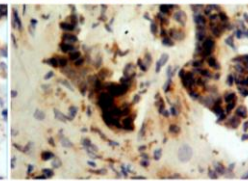

x400

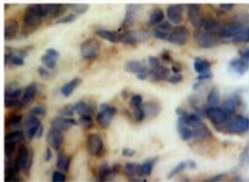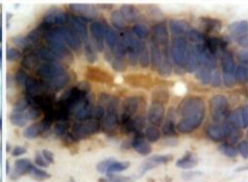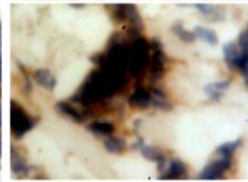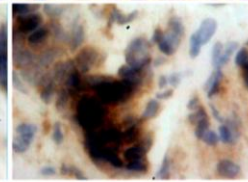

Supplement: MOESM1 [file 9540264]
